# Supplementary material for: Covalent organic frameworks as superior adsorbents for the removal of toxic substances
Source: Royal Society of Chemistry journal article supplement (doi:10.1039/d4cs00591k), 2025-01-01
Supplement: d4cs00591k1.pdf [file d4cs00591k1.pdf]

## Supplementary Information

### Covalent organic frameworks as superior adsorbents for the removal of toxic substances

Yubo Li,<sup>†\*a,b,c</sup> Jinxia Wei,<sup>†a,b</sup> Jian Wang,<sup>†c</sup> Yuanyuan Wang,<sup>a</sup> Peishuang Yu,<sup>a</sup> Yao  
Chen<sup>\*d,e</sup> and Zhenjie Zhang<sup>\*f</sup>

<sup>a</sup> School of Chinese Materia Medica, Tianjin University of Traditional Chinese Medicine, Tianjin  
301617, China, E-mail: yaowufenxi001@sina.com.

<sup>b</sup> State Key Laboratory of Chinese Medicine Modernization, Tianjin University of Traditional  
Chinese Medicine, Tianjin, 301617, China.

<sup>c</sup> Haihe Laboratory of Modern Chinese Medicine, Tianjin, 301617, China.

<sup>d</sup> Key Laboratory of Biopharmaceutical Preparation and Delivery, Chinese Academy of Sciences,  
Beijing, 100190, China.

<sup>e</sup> State Key Laboratory of Medicinal Chemical Biology, College of Pharmacy, Nankai University,  
Tianjin 300071, China, E-mail: chenyaoyao@nankai.edu.cn.

<sup>f</sup> College of Chemistry, Nankai University, Tianjin 300071, China, E-mail:  
zhangzhenjie@nankai.edu.cn.

<sup>†</sup> These authors contributed equally to this work.

\* Corresponding authors.

**Table S1** Properties and pathogenesis of typical toxicants

| Type of toxicants | Toxicants       | Physical and chemical properties                                                                                                                                                    | Toxicity endpoint or target sites                                                                                                                                           | Toxic mechanism                                                                                                                                                                                                                                                                                                                                                                                                                                                           | Ref. |
|-------------------|-----------------|-------------------------------------------------------------------------------------------------------------------------------------------------------------------------------------|-----------------------------------------------------------------------------------------------------------------------------------------------------------------------------|---------------------------------------------------------------------------------------------------------------------------------------------------------------------------------------------------------------------------------------------------------------------------------------------------------------------------------------------------------------------------------------------------------------------------------------------------------------------------|------|
|                   | Urea            | <ul style="list-style-type: none"><li>- An organic compound that amide exhibits two <math>-NH_2</math> groups</li><li>- Water soluble</li><li>- Four hydrogen donor sites</li></ul> | <ul style="list-style-type: none"><li>- Chronic kidney disease</li><li>- Uremia</li><li>- Cardiovascular disease</li><li>- Depression</li><li>- Diabetes mellitus</li></ul> | <ul style="list-style-type: none"><li>- Cause excessive formation of neutrophil extracellular traps, leading to endothelial cell dysfunction</li><li>- Induce mitochondrial reactive oxygen species (ROS), thereby inhibiting GAPDH, inactivating the anti-atherogenic enzyme PGI2 synthase and causing ER stress</li><li>- Urea or cyanate carbamylates mTOR to inhibit the mTORC1-S6K dependent dendritic protein synthesis, causing depression-like behavior</li></ul> | 1-4  |
|                   | Creatinine (CR) | <ul style="list-style-type: none"><li>- Nitrogen-containing small molecule toxin</li><li>- Water soluble</li><li>- Two hydrogen donor sites</li><li>- Namely trioxopurine</li></ul> | <ul style="list-style-type: none"><li>- Uremia</li><li>- Renal failure</li></ul>                                                                                            | <ul style="list-style-type: none"><li>- Decrease glomerular filtration rate</li><li>- Accumulation in the body, accelerate the decline of renal function</li></ul>                                                                                                                                                                                                                                                                                                        | 1    |
|                   | Uric acid (UA)  | <ul style="list-style-type: none"><li>- Water soluble</li><li>- Alcoholic form is weakly acidic</li></ul>                                                                           | <ul style="list-style-type: none"><li>- Uremia</li><li>- Chronic kidney disease</li><li>- Gout</li></ul>                                                                    | <ul style="list-style-type: none"><li>- When the level of UA in the blood is high, UA crystals form, which accumulate in the joints and kidney, causing arthritis, gout and uremia</li><li>- Increase oxidative stress and endothelial dysfunction</li></ul>                                                                                                                                                                                                              | 1,5  |

-----animal-----

|                                       |                                                                                                                                                                                                                                                         |                                                                                                                                                                                                                                                                                  |                                                                                                                                                                                                                                                                                                                                                                                                                                                                                                                                                                                                                                                                                                           |       |
|---------------------------------------|---------------------------------------------------------------------------------------------------------------------------------------------------------------------------------------------------------------------------------------------------------|----------------------------------------------------------------------------------------------------------------------------------------------------------------------------------------------------------------------------------------------------------------------------------|-----------------------------------------------------------------------------------------------------------------------------------------------------------------------------------------------------------------------------------------------------------------------------------------------------------------------------------------------------------------------------------------------------------------------------------------------------------------------------------------------------------------------------------------------------------------------------------------------------------------------------------------------------------------------------------------------------------|-------|
| Indoxyl sulfate (IS)                  | <ul style="list-style-type: none"> <li>- High protein-binding properties</li> <li>- 32% of IS can be cleared by dialysis</li> <li>- Fold change (M/N): 43.2</li> </ul>                                                                                  | <ul style="list-style-type: none"> <li>- Nephrotoxicity</li> <li>- Cardiovascular toxicity</li> <li>- Disordered bone metabolism</li> <li>- Intestinal barrier injury</li> </ul>                                                                                                 | <ul style="list-style-type: none"> <li>- ROS production and induction of oxidative stress and renal interstitial fibrosis/inflammation</li> <li>- Increase transcription factors expression, promote thrombosis and cause damage to cardiovascular system</li> <li>- IS-induced oxidative stress in osteoblasts initiates the dysregulation of bone remodeling process in early CKD</li> <li>- IS suppressed transepithelial electrical resistance and the expressions of tight junction-related genes in intestinal epithelial cells, inhibited the expression of dynamin-related protein 1 (DRP1) and mitophagic flux</li> <li>- Regulate apoptosis-related genes, induce neuronal apoptosis</li> </ul> | 6-9   |
| Amyloid- $\beta$ peptide ( $A\beta$ ) | <ul style="list-style-type: none"> <li>- The length of the <math>A\beta</math> peptide varies from 38-43 amino acids</li> <li>- The predominant form of <math>A\beta</math> peptide is <math>A\beta_{40}</math> and <math>A\beta_{42}</math></li> </ul> | <ul style="list-style-type: none"> <li>- Neurotoxicity</li> <li>- Alzheimer's disease (AD)</li> </ul>                                                                                                                                                                            | <ul style="list-style-type: none"> <li>- Induce inflammatory cascade response by activating microglia</li> <li>- Induce abnormal elevations in glutamate levels, disrupt intracellular calcium balance, impair mitochondria dysfunction, and trigger oxidative stress, leading to protein and lipid oxidation</li> </ul>                                                                                                                                                                                                                                                                                                                                                                                  | 10,11 |
| Aflatoxins (AFs)                      | <ul style="list-style-type: none"> <li>- Derivatives of difuran-coumarin</li> <li>- Almost insoluble in water, but soluble in most organic solvents</li> <li>- High thermal stability</li> </ul>                                                        | <ul style="list-style-type: none"> <li>- Hepatotoxicity</li> <li>- Immunotoxicity</li> <li>- Carcinogenicity</li> <li>- Teratogenic and mutagenic effect</li> <li>- Genotoxicity</li> <li>- Complications associated with malnutrition</li> <li>- Developmental delay</li> </ul> | <ul style="list-style-type: none"> <li>- AFs are metabolized under the action of cytochrome P450 microsomal enzymes, especially <math>AFB_1</math> is converted into aflatoxin-8,9-epoxide that combines with DNA and albumin in serum to form adducts, ultimately leading to DNA damage</li> <li>- Modulation of cytokine expression</li> <li>- Alter intestine integrity</li> </ul>                                                                                                                                                                                                                                                                                                                     | 12-14 |

|               |                    |                                                                                                                                                                                                                           |                                                                                                                                                                                                                                                                                     |                                                                                                                                                                                                                                                                                                                                                                       |       |
|---------------|--------------------|---------------------------------------------------------------------------------------------------------------------------------------------------------------------------------------------------------------------------|-------------------------------------------------------------------------------------------------------------------------------------------------------------------------------------------------------------------------------------------------------------------------------------|-----------------------------------------------------------------------------------------------------------------------------------------------------------------------------------------------------------------------------------------------------------------------------------------------------------------------------------------------------------------------|-------|
|               | Patulin (PAT)      | <ul style="list-style-type: none"> <li>- An unsaturated heterocyclic lactone mycotoxin</li> </ul>                                                                                                                         | <ul style="list-style-type: none"> <li>- Genotoxicity</li> <li>- Neurotoxicity</li> <li>- Carcinogenicity</li> <li>- Teratogenicity</li> <li>- Mutagenicity</li> <li>- Immunotoxicity</li> <li>- Hepatotoxicity</li> <li>- Nephrotoxicity</li> <li>- Intestinal toxicity</li> </ul> | <ul style="list-style-type: none"> <li>- Cause damage to protein activity or function through the reaction of electrophilic groups on PAT with sulfhydryl groups on protein molecules or enzyme active sites</li> <li>- Inhibit a variety of enzyme activities</li> <li>- Induce DNA strand cross-linking, DNA double-strand breakage and oxidative damage</li> </ul> | 15-18 |
|               | Microcystins (MCs) | <ul style="list-style-type: none"> <li>- Monocyclic heptapeptide substances</li> <li>- Molecular structure contains carboxyl, amino, and amide groups</li> </ul>                                                          | <ul style="list-style-type: none"> <li>- Acute hepatotoxicity</li> <li>- Liver cancer</li> <li>- Neurotoxicity</li> <li>- Multi-organ toxicity</li> </ul>                                                                                                                           | <ul style="list-style-type: none"> <li>- Inhibit protein phosphatase 1 and 2A</li> <li>- Inhibit hyperphosphorylation caused by protein phosphatase, leading to severe liver injury</li> <li>- Oxidative stress, etc</li> <li>- Cross blood-brain barrier with the transport of Oatps/OATPs, causing neurostructural, functional, and behavioral changes</li> </ul>   | 19-22 |
| Marine toxins | Okadaic acid (OA)  | <ul style="list-style-type: none"> <li>- A polyketide and polyether derivative of a C<sub>38</sub> fatty acid</li> <li>- A lipophilic toxin (LogP = 4.21) with hydroxyl, polycyclic ether, and carboxyl groups</li> </ul> | <ul style="list-style-type: none"> <li>- Diarrhetic shellfish poisoning</li> <li>- Neurotoxicity</li> <li>- Embryotoxicity</li> <li>- Immunotoxicity</li> <li>- Genotoxicity</li> </ul>                                                                                             | <ul style="list-style-type: none"> <li>- Induce secretory diarrhea by disrupting the electrolyte balance of the intestinal epithelial barrier</li> <li>- Cause protein hyperphosphorylation to disrupt cellular biological function</li> <li>- Inhibition of serine/threonine protein phosphatases (PPs), particularly of PP1 and PP2A</li> </ul>                     | 23-25 |

|             |                          |                                                                                                                                                                                        |                                                                                                                                                                                                                                                          |                                                                                                                                                                                                                                                                                                                                                                                                                                                      |       |
|-------------|--------------------------|----------------------------------------------------------------------------------------------------------------------------------------------------------------------------------------|----------------------------------------------------------------------------------------------------------------------------------------------------------------------------------------------------------------------------------------------------------|------------------------------------------------------------------------------------------------------------------------------------------------------------------------------------------------------------------------------------------------------------------------------------------------------------------------------------------------------------------------------------------------------------------------------------------------------|-------|
| Phytotoxins | Aristolochic acids (AAs) | <ul style="list-style-type: none"> <li>- One kind of nitrophenanthrene carboxylic acids</li> <li>- Mainly exists in the form of anions in nature</li> </ul>                            | <ul style="list-style-type: none"> <li>- Strong carcinogenicity</li> <li>- Nephrotoxicity</li> <li>- Ovarian dysfunction</li> </ul>                                                                                                                      | <ul style="list-style-type: none"> <li>- Enzymatic metabolization of AA leading to the formation of DNA adducts and induction of Tp53 mutations</li> <li>- Induce oxidative/nitrosative reactive stress and mitochondrial dysfunction</li> <li>- Induction of apoptosis and inflammatory response</li> <li>- Trigger ovarian dysfunction by activating NLRP3 inflammasome and affecting mitochondrial homeostasis</li> </ul>                         | 26-28 |
|             | Hg(II)                   | <ul style="list-style-type: none"> <li>- The most common form of Hg in the aqueous phase</li> <li>- More stable</li> <li>- Highly toxic</li> <li>- Unable to be biodegraded</li> </ul> | <ul style="list-style-type: none"> <li>- Gastrointestinal ulcer</li> <li>- Central nervous system injury</li> <li>- Renal injury</li> <li>- Hepatotoxicity</li> </ul>                                                                                    | <ul style="list-style-type: none"> <li>- ROS production, lipid peroxidation, induce oxidative stress</li> <li>- Connect to the sulfhydryl groups on metallothionein, erythrocytes, or glutathione</li> <li>- Promote depolarization of inner mitochondrial membrane and enhanced production of H<sub>2</sub>O<sub>2</sub></li> <li>- Enzyme inhibition</li> <li>- Reduction of aquaporin mRNA</li> </ul>                                             | 29,30 |
|             | Pb(II)                   | <ul style="list-style-type: none"> <li>- A main existing form of Pb</li> <li>- Bioaccumulation and non-biodegradability</li> <li>- Highly toxic</li> </ul>                             | <ul style="list-style-type: none"> <li>- Carcinogenicity</li> <li>- Neurological diseases</li> <li>- Multi-organ damage, such as brain, heart, lungs, liver, blood, digestive, kidney reproductive and immune systems</li> <li>- Genotoxicity</li> </ul> | <ul style="list-style-type: none"> <li>- Cause DNA damage, chromosomal abnormalities</li> <li>- Induce posttranslational alterations to protein structure</li> <li>- ROS oxidative damage, increasing the levels of lipid peroxidation</li> <li>- Activation of glial cells, increasing inflammatory cytokines (IL-1<math>\beta</math>, TNF-<math>\alpha</math> and IL-6) and serum ET-1, NO and EPO</li> <li>- Inhibit heme biosynthesis</li> </ul> | 29-31 |

-----

|                  |                                                                                                                                                                                                                                                                                                                                                            |                                                                                                                                                                                                                                                                             |                                                                                                                                                                                                                                                                                                                                                                      |                 |
|------------------|------------------------------------------------------------------------------------------------------------------------------------------------------------------------------------------------------------------------------------------------------------------------------------------------------------------------------------------------------------|-----------------------------------------------------------------------------------------------------------------------------------------------------------------------------------------------------------------------------------------------------------------------------|----------------------------------------------------------------------------------------------------------------------------------------------------------------------------------------------------------------------------------------------------------------------------------------------------------------------------------------------------------------------|-----------------|
| As(III)<br>As(V) | <ul style="list-style-type: none"><li>- As(III) and As(V) are the main inorganic As species</li><li>- As(III) has higher fluidity and toxicity, more than 60 times that of As(V)</li><li>- As(V) is the thermodynamically stable form in oxygenated aqueous environments, while As(III) is generally stable under moderately reducing conditions</li></ul> | <ul style="list-style-type: none"><li>- Cardiovascular disease</li><li>- Gastrointestinal disorders</li><li>- Central nervous system injury</li><li>- Renal insufficiency</li><li>- Hepatotoxicity</li><li>- Carcinogenicity</li><li>- Skin damage</li></ul>                | <ul style="list-style-type: none"><li>- Thiol binding (GSH conjugation)</li><li>- Cause oxidative stress, inflammation, DNA damage, mitochondrial dysfunction</li><li>- Neurotransmitter homeostasis and molecular alterations</li><li>- Decreased the activity of serum cholinesterase, mitochondrial enzymes and uncoupling of oxidative phosphorylation</li></ul> | 29,30,32,3<br>3 |
| Cd(II)           | <ul style="list-style-type: none"><li>- Cd exists as Cd(II) in the natural environment</li><li>- Highly soluble</li><li>- Highly toxic</li><li>- Bioaccumulation and non-biodegradability</li></ul>                                                                                                                                                        | <ul style="list-style-type: none"><li>- Testicular damage</li><li>- Fulminant hepatitis</li><li>- Pulmonary edema</li><li>- Hemorrhage</li><li>- Kidney and liver damage</li><li>- Brain and bone toxicity</li><li>- Autoimmune</li><li>- Genotoxicity and cancer</li></ul> | <ul style="list-style-type: none"><li>- Cause apoptosis</li><li>- ROS generation and oxidative stress development</li><li>- Aberrant gene expression</li><li>- Endoplasmic reticulum stress</li><li>- Disturb the DNA synthesis and DNA repair by the proteotoxicity and DNA damage induced by oxidative stress</li><li>- Alter phosphorylation cascades</li></ul>   | 29,30,34        |

-----

|                                   |                                                                                                                                                                                                                                                                               |                                                                                                                                                                                                                                                                                                          |                                                                                                                                                                                                                                                                                                                                                                                          |                 |
|-----------------------------------|-------------------------------------------------------------------------------------------------------------------------------------------------------------------------------------------------------------------------------------------------------------------------------|----------------------------------------------------------------------------------------------------------------------------------------------------------------------------------------------------------------------------------------------------------------------------------------------------------|------------------------------------------------------------------------------------------------------------------------------------------------------------------------------------------------------------------------------------------------------------------------------------------------------------------------------------------------------------------------------------------|-----------------|
| Cr(VI)                            | <ul style="list-style-type: none"> <li>- A strong oxidant with a high positive charge and a small radius</li> <li>- Mainly in the form of anions such as <math>\text{CrO}_4^{2-}</math>, <math>\text{Cr}_2\text{O}_7^{2-}</math>, and <math>\text{HCrO}_4^-</math></li> </ul> | <ul style="list-style-type: none"> <li>- Renal insufficiency</li> <li>- Gastrointestinal disorders</li> <li>- Skin disorders</li> <li>- Increase the incidence of many cancers</li> <li>- Respiratory, immune, cardiovascular, nervous and reproductive system damage</li> <li>- Genotoxicity</li> </ul> | <ul style="list-style-type: none"> <li>- ROS generation and cause oxidative stress</li> <li>- DNA adduct formation to induce DNA damage</li> <li>- Dysregulated cell proliferation</li> <li>- Induce free radical production and result in DNA damage</li> <li>- Lead to the formation of DNA-protein cross-links and Cr-DNA adducts, block DNA transcription and replication</li> </ul> | 29,30,33,3<br>4 |
| Neonicotinoid insecticides (NEOs) | <ul style="list-style-type: none"> <li>- Obtained by functional group transformation on the basis of nicotine molecular structure</li> <li>- High water solubility</li> <li>- Has hydrogen bond receptor and hydrogen bond donor</li> </ul>                                   | <ul style="list-style-type: none"> <li>- Neurotoxicity</li> <li>- Cardiovascular effects</li> <li>- Respiratory failure</li> <li>- Sedation and seizures</li> <li>- Rhabdomyolysis</li> </ul>                                                                                                            | <ul style="list-style-type: none"> <li>- Bind to nicotinic acetylcholine receptor, causing nicotinic symptoms and severe neurological damage</li> </ul>                                                                                                                                                                                                                                  | 35-37           |
| Triazole fungicides               | <ul style="list-style-type: none"> <li>- Nitrogen-containing heterocyclic compounds</li> </ul>                                                                                                                                                                                | <ul style="list-style-type: none"> <li>- Reproductive and developmental toxicity</li> <li>- Mutagenicity</li> <li>- Carcinogenicity</li> <li>- Endocrine disrupting effects</li> <li>- Liver toxicity</li> </ul>                                                                                         | <ul style="list-style-type: none"> <li>- Accumulate in the liver, cause liver functional abnormalities and metabolic disorders</li> <li>- Interfere with lipid metabolism by binding to nuclear receptors (peroxisome proliferator-activated receptors and retinoid X receptor)</li> <li>- Interfere with estrogen-induced signal transduction</li> </ul>                                | 38,39           |

---

|                                    |                                                                                                                                                                                                                                                                                        |                                                                                                                                                                                                                                                                                                                                                                                                                                                                       |                                                                                                                                                                                                                                                                                                                                                              |       |
|------------------------------------|----------------------------------------------------------------------------------------------------------------------------------------------------------------------------------------------------------------------------------------------------------------------------------------|-----------------------------------------------------------------------------------------------------------------------------------------------------------------------------------------------------------------------------------------------------------------------------------------------------------------------------------------------------------------------------------------------------------------------------------------------------------------------|--------------------------------------------------------------------------------------------------------------------------------------------------------------------------------------------------------------------------------------------------------------------------------------------------------------------------------------------------------------|-------|
| Organophosphorus pesticides (OPPs) | <ul style="list-style-type: none"> <li>- Most of them are phosphate or phosphorothioate esters</li> <li>- R<sub>1</sub> and R<sub>2</sub> in their structural formulas are mostly methoxy (CH<sub>3</sub>O<sup>-</sup>) or ethoxy (C<sub>2</sub>H<sub>5</sub>O<sup>-</sup>)</li> </ul> | <ul style="list-style-type: none"> <li>- Various neurological disorders, such as AD, Parkinson's disease, and other neurotoxicity</li> <li>- Metabolic diseases, e.g. diabetes, hyperlipidemia</li> <li>- Hepatic toxicity</li> <li>- Renal insufficiency</li> <li>- Cardiopulmonary toxicity</li> <li>- Immunotoxicity</li> <li>- Genotoxicity</li> <li>- Endocrine toxicity</li> <li>- Neurotoxicity</li> <li>- Hepatotoxicity</li> <li>- Nephrotoxicity</li> </ul> | <ul style="list-style-type: none"> <li>- Irreversibly bind to acetylcholinesterase</li> <li>- Cause oxidative stress, reduce the membrane potential of mitochondria, leading to mitochondrial DNA mutations</li> <li>- Inflammation response</li> </ul>                                                                                                      | 40,41 |
| Fipronil                           | <ul style="list-style-type: none"> <li>- Phenylpyrazole chemicals</li> </ul>                                                                                                                                                                                                           | <ul style="list-style-type: none"> <li>- Reproductive toxicity</li> <li>- Neurodegenerative effects</li> <li>- Endocrine system changes</li> <li>- Carcinogenicity</li> </ul>                                                                                                                                                                                                                                                                                         | <ul style="list-style-type: none"> <li>- Interfere with GABA-gated channels and disrupt normal neuronal influx by targeting GABA-gated chloride channels</li> <li>- Inhibit human <math>\alpha_1</math>, <math>\alpha_1\beta</math>, <math>\alpha_2</math>, and <math>\alpha_3</math> glycine receptor subtypes</li> </ul>                                   | 42,43 |
| Trifluralin                        | <ul style="list-style-type: none"> <li>- Fluorinated dinitroaniline</li> <li>- Low water solubility (lipophilic)</li> </ul>                                                                                                                                                            | <ul style="list-style-type: none"> <li>- Cytotoxicity</li> <li>- Genotoxicity</li> </ul>                                                                                                                                                                                                                                                                                                                                                                              | <ul style="list-style-type: none"> <li>- Inhibition of Ca<sup>2+</sup> transport mechanisms at the plasmatic membrane</li> <li>- Activate the oxidative stress pathway and chromosomal damage</li> <li>- Mild mitochondrial dysfunction, mitophagy, or inhibition of proliferation</li> <li>- Alter the expression levels of cancer-related genes</li> </ul> | 44,45 |

---



---

|               |                 |                                                                                                                                                                                                                                                                                                                         |                                                                                                                                                                                                              |                                                                                                                                                                                                                                                                                                                                 |       |
|---------------|-----------------|-------------------------------------------------------------------------------------------------------------------------------------------------------------------------------------------------------------------------------------------------------------------------------------------------------------------------|--------------------------------------------------------------------------------------------------------------------------------------------------------------------------------------------------------------|---------------------------------------------------------------------------------------------------------------------------------------------------------------------------------------------------------------------------------------------------------------------------------------------------------------------------------|-------|
|               | Iodine (I)      | <ul style="list-style-type: none"> <li>- Strong volatility and high diffusion coefficient</li> <li>- <math>^{129}\text{I}</math> and <math>^{131}\text{I}</math> are the two main radionuclides of iodine</li> <li>- Form polyiodides in an aqueous medium</li> <li>- The most common are the triiodide ions</li> </ul> | <ul style="list-style-type: none"> <li>- Thyroid cancer</li> <li>- Unconsciousness</li> </ul>                                                                                                                | <ul style="list-style-type: none"> <li>- Accumulate in the thyroid gland and interfere metabolic system</li> </ul>                                                                                                                                                                                                              | 46,47 |
| Radionuclides | Uranium (U)     | <ul style="list-style-type: none"> <li>- U(VI) has strong fluidity, high radioactivity and high toxicity</li> <li>- U(IV) is less soluble and relatively immobile</li> </ul>                                                                                                                                            | <ul style="list-style-type: none"> <li>- Severe kidney injury</li> <li>- Pulmonary toxicity</li> <li>- Other organs damage, mainly hepatic, hematopoietic, neurological, and reproductive effects</li> </ul> | <ul style="list-style-type: none"> <li>- Oxidative stress</li> <li>- Genetic damage</li> <li>- Protein injury</li> <li>- Cell apoptosis</li> <li>- Inflammation</li> <li>- Metabolic disorders</li> </ul>                                                                                                                       | 48,49 |
|               | Technetium (Tc) | <ul style="list-style-type: none"> <li>- Exist in the form of pertechnetate anion (<math>\text{TcO}_4^-</math>)</li> <li>- High water solubility</li> <li>- Extremely high mobility</li> </ul>                                                                                                                          | <ul style="list-style-type: none"> <li>- Radiation damage</li> </ul>                                                                                                                                         | <ul style="list-style-type: none"> <li>- Radiation causes ionization and stimulation of intracellular molecules, disrupting the normal functioning of biological organisms</li> <li>- Cause ionization or excitation of biological macromolecules and proteins, resulting in structural changes and loss of activity</li> </ul> | 50,51 |

---

---

|        |                                                       |                                                                                                                                                                                          |                                                                                                                                                                                                                                                                                                                                                                                                          |                                                                                                                                                                                                                                                                                                                                                                                               |       |
|--------|-------------------------------------------------------|------------------------------------------------------------------------------------------------------------------------------------------------------------------------------------------|----------------------------------------------------------------------------------------------------------------------------------------------------------------------------------------------------------------------------------------------------------------------------------------------------------------------------------------------------------------------------------------------------------|-----------------------------------------------------------------------------------------------------------------------------------------------------------------------------------------------------------------------------------------------------------------------------------------------------------------------------------------------------------------------------------------------|-------|
| Others | Chlorination disinfection by-products (Cl-DBPs)       | <ul style="list-style-type: none"> <li>- Include aliphatic and aromatic DBPs</li> <li>- Aromatic DBPs are more toxic than many aliphatic DBPs</li> </ul>                                 | <ul style="list-style-type: none"> <li>- Colorectal cancer</li> <li>- Bladder, stomach, lymphoma, kidney, pancreas, breast, and oesophagus cancer</li> <li>- Birth defects</li> <li>- Stillbirths and spontaneous abortions</li> <li>- Genotoxicity</li> <li>- Cytotoxicity</li> <li>- Teratogenicity and endocrine disruption</li> <li>- Neurotoxicity</li> <li>- Harmful endocrine effects:</li> </ul> | <ul style="list-style-type: none"> <li>- Modulate various signaling pathways, leading to endocrine disorders and DNA damage, mimicking or antagonizing endogenous hormones</li> </ul>                                                                                                                                                                                                         | 52-54 |
|        | Perfluoroalkyl and polyfluoroalkyl substances (PFASs) | <ul style="list-style-type: none"> <li>- Perfluoroalkyl is fully fluorine</li> <li>- Polyfluoroalkyl substances have a non-fluorine atom attached to at least one carbon atom</li> </ul> | <ul style="list-style-type: none"> <li>- Thyroid disease</li> <li>- Hepatotoxicity</li> <li>- Immunotoxicity</li> <li>- Neurotoxicity</li> <li>- Reproduction and development toxicity</li> <li>- Carcinotoxicity</li> </ul>                                                                                                                                                                             | <ul style="list-style-type: none"> <li>- Disturb steroidogenesis</li> <li>- Interfere with steroid hormone receptors</li> <li>- PFAS is proved to be both PPAR<math>\alpha</math> and CAR agonist, causing toxicity</li> <li>- Changes in lipid metabolism</li> <li>- Oxidative stress</li> <li>- Result in altered androgen and insulin-like factor 3 (INSL3) dependent processes</li> </ul> | 55,56 |

---

## References

- 1 S. Wu, P. Yue, Y. Ma, Y. Zou, W. Liang and Q. Ye, *Adv. Mater.*, 2023, 2305152.
- 2 M. D'Apolito, X. Du, D. Pisanelli, M. Pettoello-Mantovani, A. Campanozzi, F. Giacco, A. B. Maffione, A. L. Colia, M. Brownlee and I. Giardino, *Atherosclerosis*, 2015, **239**, 393-400.
- 3 H. Wang, B. Huang, W. Wang, J. Li, Y. Chen, T. Flynn, M. Zhao, Z. Zhou, X. Lin, Y. Zhang, M. Xu, K. Li, K. Tian, D. Yuan, P. Zhou, L. Hu, D. Zhong, S. Zhu, J. Li, D. Chen, K. Wang, J. Liang, Q. He, J. Sun, J. Shi, L. Yan, J. M. Sands, Z. Xie, X. Lian, D. Xu, J. Ran and B. Yang, *EBioMedicine*, 2019, **48**, 478-490.
- 4 V. Verdier, C. O. Soulage and L. Koppe, *Nephrol. Dial. Transpl.*, 2021, **37**, 1-4.
- 5 E. Harlacher, J. Wollenhaupt, C. C. F. M. J. Baaten and H. Noels, *Int. J. Mol. Sci.*, 2022, **23**, 531.
- 6 Y. J. Lim, N. A. Sidor, N. C. Tonial, A. Che and B. L. Urquhart, *Toxins*, 2021, **13**, 142.
- 7 C.-L. Lu, C.-M. Zheng, K.-C. Lu, M.-T. Liao, K.-L. Wu and M.-C. Ma, *Antioxidants*, 2021, **10**, 936.
- 8 G. Lano, M. Laforêt, C. Von Kotze, J. Perrin, T. Addi, P. Brunet, S. Poitevin, S. Burtet and L. Dou, *Int. J. Mol. Sci.*, 2020, **21**, 2392.
- 9 Y. Huang, J. Zhou, S. Wang, J. Xiong, Y. Chen, Y. Liu, T. Xiao, Y. Li, T. He, Y. Li, X. Bi, K. Yang, W. Han, Y. Qiao, Y. Yu and J. Zhao, *Theranostics*, 2020, **10**, 7384-7400.
- 10 X. Wang, H. Li, Y. Sheng, B. He, Z. Liu, W. Li, S. Yu, J. Wang, Y. Zhang, J. Chen, L. Qin and X. Meng, *Biomed. Pharmacother.*, 2024, **171**, 116071.
- 11 T. Guo, D. Zhang, Y. Zeng, T. Y. Huang, H. Xu and Y. Zhao, *Mol. Neurodegener.*, 2020, **15**, 40.
- 12 Z. Peng, Y. Zhang, Z. Ai, R. Pandiselvam, J. Guo, A. Kothakota and Y. Liu, *Compr. Rev. Food. Sci. Food Saf.*, 2023, **22**, 4030-4052.
- 13 J. Jin, V. L. Kouznetsova, S. Kesari and I. F. Tsigelny, *Toxicology*, 2023, **499**, 153652.

- 14 V. O. Okechukwu, O. A. Adelusi, A. P. Kappo, P. B. Njobeh and M. A. Mamo, *Food Chem.*, 2024, **436**, 137775.
- 15 Y. Song, S. Liu, M. Zhai, S. Han and Q. Leng, *Food Chem.*, 2023, **416**, 135855.
- 16 G. L. Ngolong Ngea, Q. Yang, R. Castoria, X. Zhang, M. N. Routledge and H. Zhang, *Compr. Rev. Food Sci. Food Saf.*, 2020, **19**, 2447-2472.
- 17 E. Diao, K. Ma, S. Qian, H. Zhang, P. Xie, R. Mao and H. Song, *Toxicol.*, 2022, **205**, 31-37.
- 18 Y. Li, S. Shan, D. Wu, S. Hu, Z. Xu, R. Zhu, *Food Science*, 2023, **44**, 309-316.
- 19 S. P. S. Fernandes, P. Kovář, M. Pšenička, A. M. S. Silva, L. M. Salonen and B. Espiña, *ACS Appl. Mater. Interfaces*, 2021, **13**, 15053-15063.
- 20 J. Lu, J. Zhou, H. Guo, Y. Li, X. He, L. Chen and Y. Zhang, *J. Chromatogr. A*, 2022, **1676**, 463290.
- 21 Y. Hu, J. Chen, H. Fan, P. Xie and J. He, *Environ. Sci. Pollut. Res. Int.*, 2016, **23**, 7211-7219.
- 22 Y. Ma, H. Liu, X. Du, Z. Shi, X. Liu, R. Wang, S. Zhang, Z. Tian, L. Shi, H. Guo and H. Zhang, *Environ. Int.*, 2021, **154**, 106661.
- 23 G. Qi, *J. Chromatogr. A*, 2023, **1708**, 464334.
- 24 L. M. Salonen, S. R. Pinela, S. P. S. Fernandes, J. Louçano, E. Carbó-Argibay, M. P. Sarriá, C. Rodríguez-Abreu, J. Peixoto and B. Espiña, *J. Chromatogr. A*, 2017, **1525**, 17-22.
- 25 Y. Liu, T.-Q. Yuan, J.-W. Zheng, D.-W. Li, Y.-H. Jiao, H.-Y. Li, R.-M. Li and W.-D. Yang, *Ecotoxicol. Environ. Saf.*, 2023, **263**, 115376.
- 26 J. Wei, X. Shao, J. Guo, Y. Zheng, Y. Wang, Z. Zhang, Y. Chen and Y. Li, *J. Hazard. Mater.*, 2024, **461**, 132140.
- 27 E. E. Anger, F. Yu and J. Li, *Int. J. Mol. Sci.*, 2020, **21**, 1157.
- 28 M.-X. Sun, F.-X. Qiao, Z.-R. Xu, Y.-C. Liu, C.-L. Xu, H.-L. Wang, Z.-Q. Qi and Y. Liu, *Free Radical Bio. Med.*, 2023, **204**, 313-324.
- 29 L. Parida and T. N. Patel, *Environ. Monit. Assess.*, 2023, **195**, 766.
- 30 M. Balali-Mood, K. Naseri, Z. Tahergorabi, M. R. Khazdair and M. Sadeghi, *Front. Pharmacol.*, 2021, **12**, 643972.

- 31 R. Nagaraju, R. Kalahasthi, R. Balachandar and B. S. Bagepally, *Arch. Toxicol.*, 2022, **96**, 2899-2911.
- 32 G. I. V. Cervantes, D. F. G. Esquivel, D. R. Ortega, T. B. Ayala, L. A. R. Chavez, H. E. Lopez-Lopez, A. Salazar, I. Flores, B. Pineda, S. Gomez-Manzo and V. Perez de la Cruz, *Cells*, 2023, **12**, 2537.
- 33 Y. Fu, L. Wang, W. Peng, Q. Fan, Q. Li, Y. Dong, Y. Liu, G. Boczkaj and Z. Wang, *J. Hazard. Mater.*, 2021, **417**, 126041.
- 34 X. Xia, S. Wu, Z. Zhou and G. Wang, *J. Hazard. Mater.*, 2021, **401**, 123685.
- 35 W. Yan, J. Zhang, C. Wang and Y. Xia, *Food Chem.*, 2023, **429**, 136872.
- 36 K. S. Campbell, P. G. Keller, L. M. Heinzl, S. A. Golovko, D. R. Seeger, M. Y. Golovko and J. L. Kerby, *Sci. Total Environ.*, 2022, **813**, 152424.
- 37 M. B. Forrester, *Hum. Exp. Toxicol.*, 2014, **33**, 568-573.
- 38 Y.-X. Wang, X.-F. Shen, J.-Q. Zhang and Y.-H. Pang, *Environ. Pollut.*, 2023, **333**, 121971.
- 39 Y. Wang, X. Ning, G. Li and N. Sang, *J. Hazard. Mater.*, 2022, **424**, 127479.
- 40 S. Kaur, S. Chowdhary, D. Kumar, R. Bhattacharyya and D. Banerjee, *Clin. Chim. Acta*, 2023, **551**, 117584.
- 41 H. Fu, P. Tan, R. Wang, S. Li, H. Liu, Y. Yang and Z. Wu, *J. Hazard. Mater.*, 2022, **424**, 127494.
- 42 C. Qian, J. Dai, Y. Tian, Y. Duan and Y. Li, *Sci. Total Environ.*, 2020, **725**, 138487.
- 43 P. Bhatt, S. Gangola, S. Ramola, M. Bilal, K. Bhatt, Y. Huang, Z. Zhou and S. Chen, *Microbiol. Res.*, 2023, **266**, 127247.
- 44 A. Giglio and M. L. Vommaro, *Environ. Sci. Pollut. Res.*, 2022, **29**, 76687–76711.
- 45 M. Alehashem, A. J. Alcaraz, N. Hogan, L. Weber, S. D. Siciliano and M. Hecker, *Sci. Total Environ.*, 2024, **933**, 173041.
- 46 Y. Zhu, Y. Qi, X. Guo, M. Zhang, Z. Jia, C. Xia, N. Liu, C. Bai, L. Ma and Q. Wang, *J. Mater. Chem. A*, 2021, **9**, 16961-16966.
- 47 S. Saurabh, S. Mollick, Y. D. D. More, A. Banerjee, S. Fajal, N. Kumar, M. M. M. Shirolkar, S. B. B. Ogale and S. K. K. Ghosh, *ACS Mater. Lett.*, 2023, **5**, 2422-

2430.

- 48 C.-P. Niu, C.-R. Zhang, W.-R. Cui, S.-M. Yi, R.-P. Liang and J.-D. Qiu, *J. Hazard. Mater.*, 2022, **425**, 127951.
- 49 L. Zhang, J. Chu, B. Xia, Z. Xiong, S. Zhang and W. Tang, *Toxics*, 2022, **10**, 575.
- 50 X.-R. Chen, C.-R. Zhang, W. Jiang, X. Liu, Q.-X. Luo, L. Zhang, R.-P. Liang and J.-D. Qiu, *Sep. Purif. Technol.*, 2023, **312**, 123409.
- 51 M. Hao, Z. Chen, H. Yang, G. I. N. Waterhouse, S. Ma and X. Wang, *Sci. Bull.*, 2022, **67**, 924-932.
- 52 H. Chen, T. Lin, S. Zhang, W. Chen, H. Xu and H. Tao, *Sci. Total Environ.*, 2020, **746**, 141138.
- 53 S. Koley, S. Dash, M. Khwairakpam and A. S. Kalamdhad, *J. Environ. Manage.*, 2024, **351**, 119770.
- 54 R. S. Chaves, C. S. Guerreiro, V. V. Cardoso, M. J. Benoliel and M. M. Santos, *Comp. Biochem. Physiol. C-Toxicol. Pharmacol.*, 2019, **223**, 53-61.
- 55 A. F. Peritore, E. Gugliandolo, S. Cuzzocrea, R. Crupi and D. Britti, *Int. J. Mol. Sci.*, 2023, **24**, 11707.
- 56 L. Calvert, M. P. Green, G. N. De Iuliis, M. D. Dun, B. D. Turner, B. O. Clarke, A. L. Eamens, S. D. Roman and B. Nixon, *Front. Endocrinol.*, 2022, **12**, 799043.
